# Supplementary material
Source: Springer Nature journal article supplement (https://www.springermedizin.de/resource/supplementary/12970_2009_170_MOESM2_ESM.pdf/9594506)
Supplement: MOESM2 [file 9594506]

**Figure 2 – Effect of BA Supplementation (6.0g/d for 28 days) vs. an equivalent dose and duration of PL Supplementation on Percentage of Max Heart Rate where OBLA occurs**

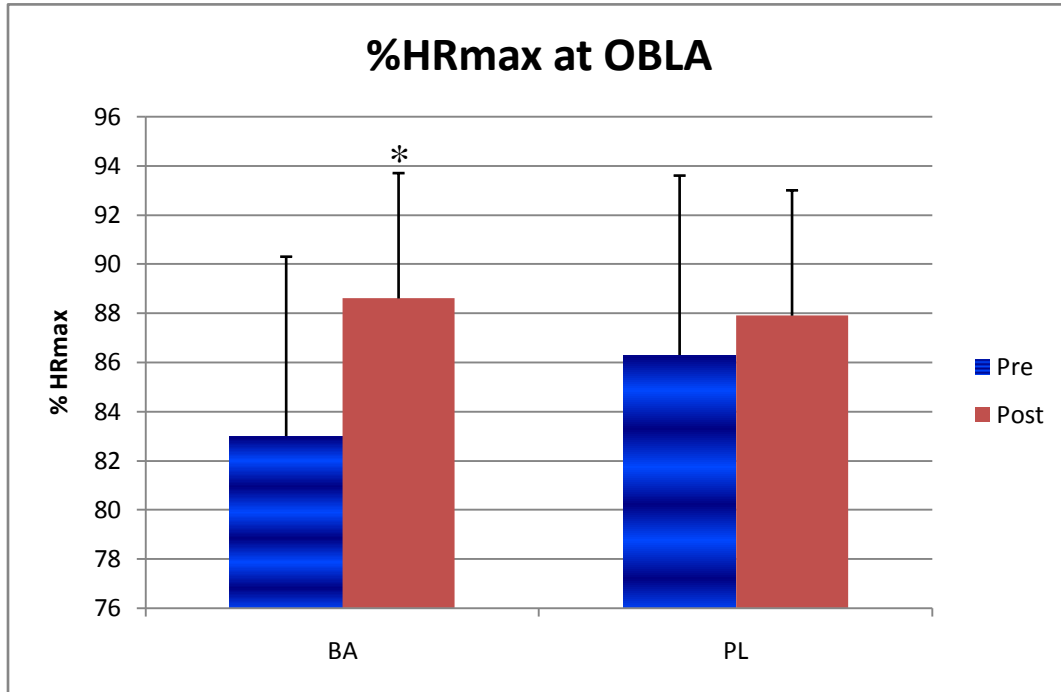

\*p<0.05 BA vs. PL
